# Supplementary material for: The role of cytosine methylation in regulating the topology and liquid–liquid phase separation of DNA G-quadruplexes
Source: Royal Society of Chemistry journal article supplement (doi:10.1039/d4sc06959e), 2025-01-01
Supplement: d4sc06959e1.pdf [file d4sc06959e1.pdf]

**Supporting Information for:**

**The role of cytosine methylation in regulating the topology and liquid-liquid phase separation of DNA G-quadruplexes**

Mitsuki Tsuruta, Sumit Shil, Shinya Taniguchi, Keiko Kawauchi, Daisuke Miyoshi\*

Faculty of Frontiers of Innovative Research in Science and Technology (FIRST), Konan University, 7-1-20 Minatojima-minamimachi, Chuo-ku, Kobe, Hyogo, 650-0047, Japan.

\* Correspondence and requests for materials should be addressed to Daisuke Miyoshi

(email: [miyoshi@konan-u.ac.jp](mailto:miyoshi@konan-u.ac.jp)).

This file includes

Supplementary Table S1 – S3

Supplementary Figures S1 – S16

Table S1 Chromosome number, start sites, and gene symbol of (GGGGCC)<sub>4</sub>

| <b>Chromosome number</b> | <b>Start site</b> | <b>Gene symbol*</b> |
|--------------------------|-------------------|---------------------|
| chr1                     | 110607470         | KCNA2               |
| chr1                     | 150579772         | MCL1                |
| chr2                     | 168247289         | STK39               |
| chr4                     | 2387058           |                     |
| chr4                     | 82561547          |                     |
| chr4                     | 186144723         | FAM149A             |
| chr5                     | 177371074         | RGS14               |
| chr6                     | 43021678          | RRP36               |
| chr6                     | 109483543         | ZBTB24              |
| chr7                     | 123748477         | AC006333.2          |
| chr9                     | 129569211         |                     |
| chr9                     | 129666157         |                     |
| chr9                     | 131394270         | PRRC2B              |
| chr9                     | 136327775         | GPSM1               |
| chr10                    | 46337044          | AGAP14P             |
| chr10                    | 46816336          | AGAP13P             |
| chr11                    | 910938            | CHID1               |
| chr11                    | 2884860           | CDKN1C              |
| chr12                    | 51217720          | POU6F1              |
| chr12                    | 54082575          | AC023794.5          |
| chr13                    | 106917584         |                     |
| chr13                    | 113585151         | TFDP1               |
| chr16                    | 1153342           | CACNA1H             |
| chr16                    | 1614313           | CRAMP1              |
| chr16                    | 49492476          | ZNF423              |
| chr17                    | 38454151          | AC244153.1          |
| chr19                    | 613554            | HCN2                |
| chrX                     | 53625858          | HUWE1               |
| chrX                     | 154341585         |                     |

\*Gene symbols are written when (GGGGCC)<sub>4</sub> sites are identified in the promoter region of genes.

Table S2. DNA duplex sequences used in this study

| Abbreviation | Sequence (5'-3')*                                                   |
|--------------|---------------------------------------------------------------------|
| Duplex-0Me   | GGCTGCGGTC / GACCGCAGCC                                             |
| Duplex-8Me   | GG <u>C</u> TG <u>C</u> GGT <u>C</u> / GAC <u>C</u> GCAG <u>C</u> C |

\*C indicates the position of 5-methylcytosine.

Table S3. DNA sequences used in this study

| Abbreviation | Sequence (5'-3')*       |
|--------------|-------------------------|
| P1           | TGAGGGTGGGTAGGGTGGGTAA  |
| abasic P1    | TGAGGGXGGGXXGGGXXGGGTAA |
| Tetramer G4  | TTGGGG                  |

\*X indicates the position of abasic site.

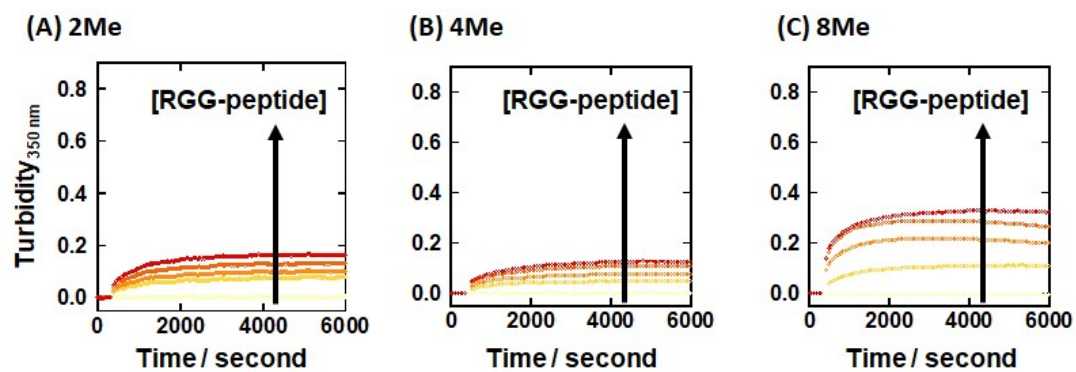

Figure S1. Turbidity changes at 350 nm of 5  $\mu\text{M}$  DNAs [(A) 2Me, (B) 4Me, and (C) 8Me] with various concentrations (0, 1, 3, 5, 10, and 15  $\mu\text{M}$ ) of RGG-peptide in the KCl buffer at 25°C.

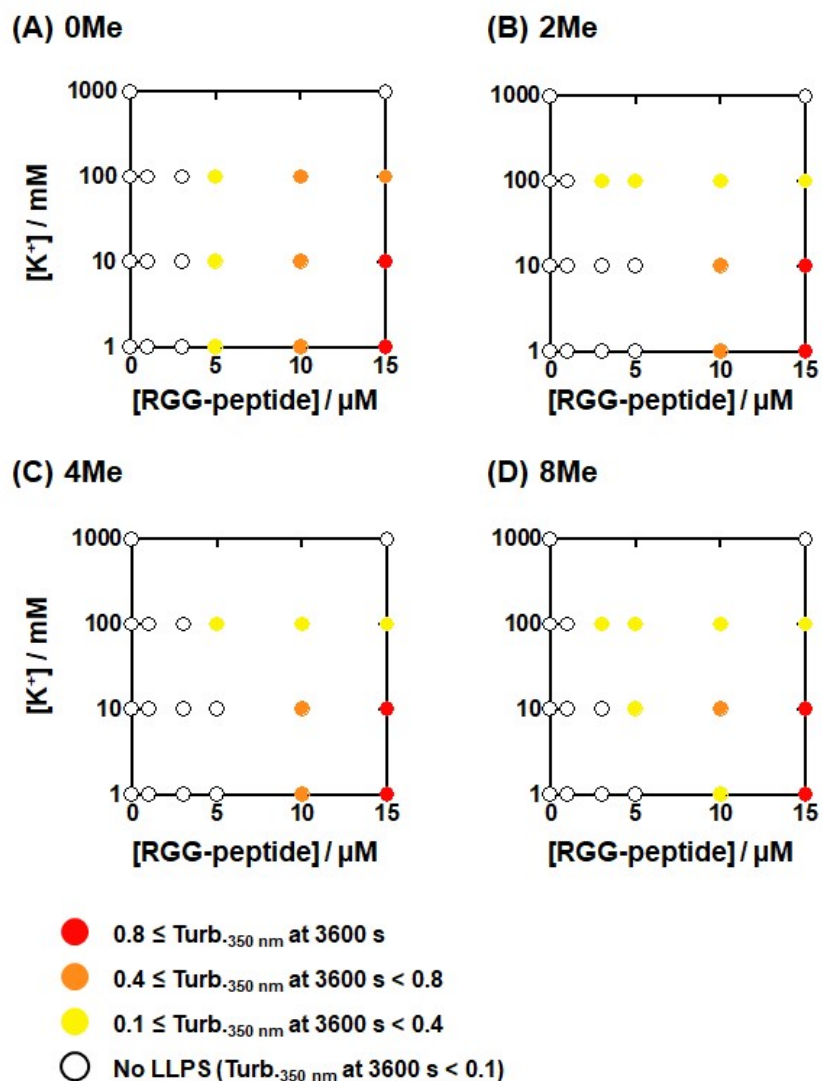

Figure S2. Phase diagram for mixtures of 5  $\mu\text{M}$  DNAs and various RGG-peptide concentrations (0, 1, 3, 5, 10, and 15  $\mu\text{M}$ ) in 10 mM  $\text{K}_2\text{HPO}_4$  (pH 7.0) and 1 mM  $\text{K}_2\text{EDTA}$  with various concentrations (1, 10, 100, and 1000 mM) of KCl at 25  $^\circ\text{C}$ . The circle colors indicate the values of turbidity<sub>350 nm</sub> at 3600 s [below 0.1 (white), 0.1 to 0.4 (yellow), 0.4 to 0.8 (orange), and above 0.8 (red)]

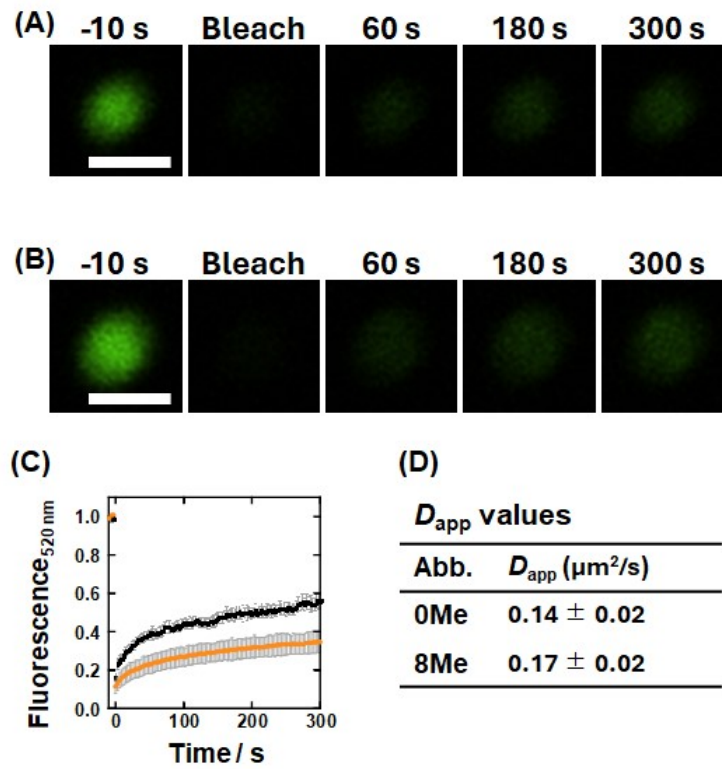

Figure S3. Confocal fluorescence microscopy images for droplets formed by 5  $\mu\text{M}$  FAM-tagged 0Me (A) or 8Me (B) in the presence of 5  $\mu\text{M}$  RGG-peptide at room temperature. Scale bar = 1  $\mu\text{m}$ . Negative time indicates droplets before bleaching. (C) FRAP curves for a mixture of 5  $\mu\text{M}$  DNAs [0Me (black) and 8Me (orange)] with 5  $\mu\text{M}$  RGG-peptide. (D) The apparent diffusion coefficient ( $D_{app}$ ) of respective DNAs within droplet evaluated by exponential fitting ( $N = 3$ ).

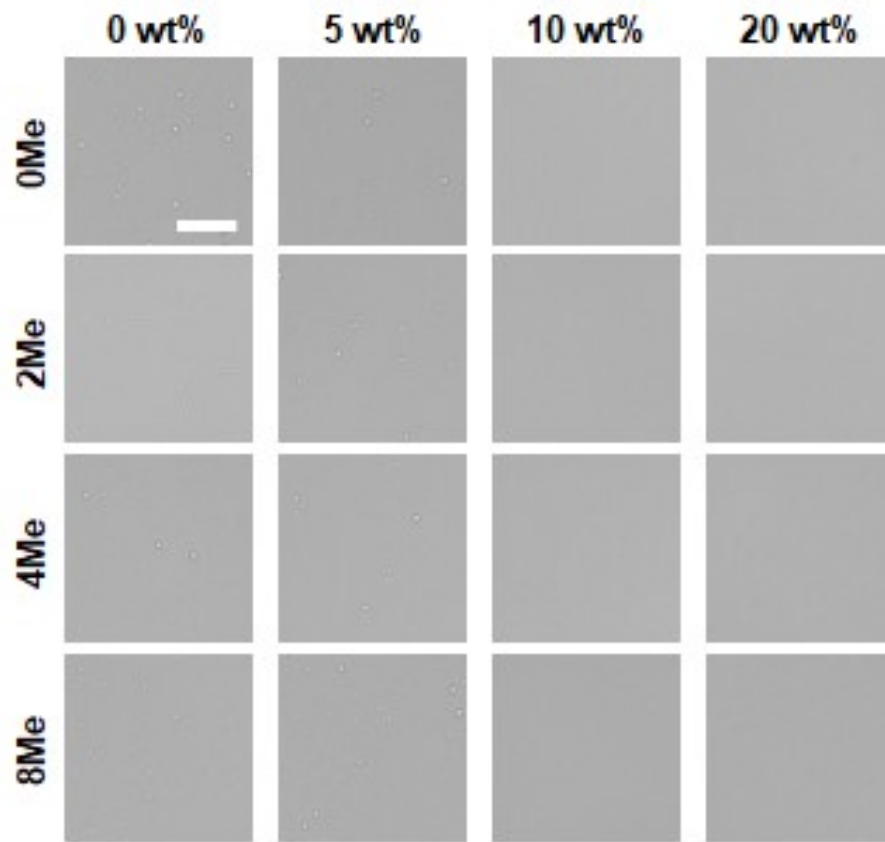

Figure S4. DIC images of droplets formed by 5  $\mu\text{M}$  DNAs (0Me, 2Me, 4Me, and 8Me) with 5  $\mu\text{M}$  RGG-peptide in the presence of various concentrations (0, 5, 10, and 20 wt%) of 1,6-hexanediol in the KCl buffer at room temperature. Scale bar = 10  $\mu\text{m}$



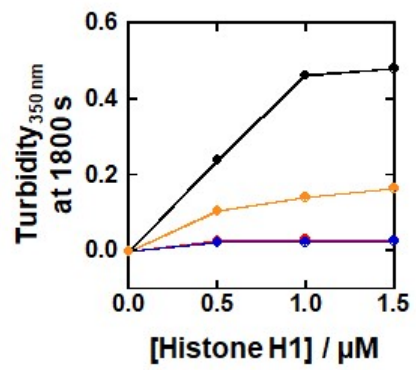

Figure S5. Turbidity<sub>350 nm</sub> at 1800 s of 3.00  $\mu\text{M}$  various DNAs (0Me; black, 2Me; red, 4Me; blue, 8Me; orange) with 0.00, 0.25, 0.50, 1.00, and 1.50  $\mu\text{M}$  Histone H1 in the KCl buffer at 25 °C.

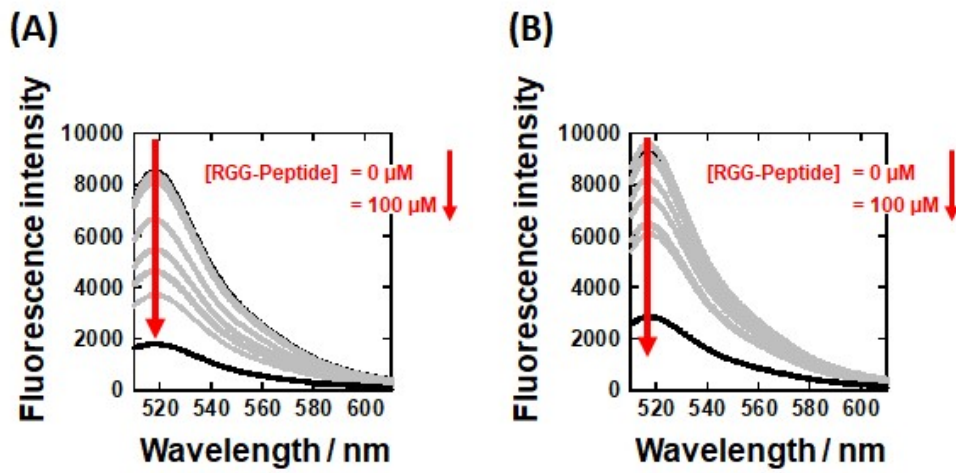

Figure S6. Fluorescence spectra of 50 nM FAM-tagged 0Me (A) and FAM-tagged 8Me (B) with various concentration (0, 0.01, 0.03, 0.1, 0.3, 1, 3, 10, 30, and 100  $\mu\text{M}$ ) of RGG-peptide in the KCl buffer at 25  $^{\circ}\text{C}$ .

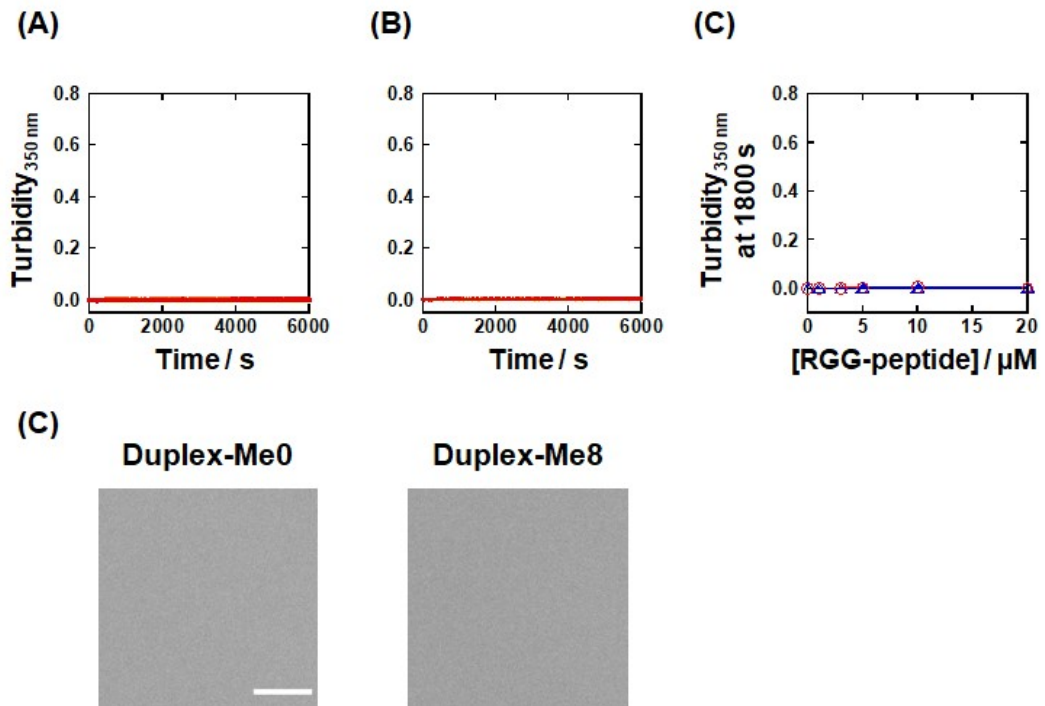

Figure S7. Turbidity changes at 350 nm for a mixture of 5  $\mu\text{M}$  DNAs (Duplex-Me0: A, Duplex-Me8: B) and various concentrations of RGG-peptide (0, 1, 3, 5, 10, and 20  $\mu\text{M}$ ) in a buffer containing 100 mM KCl, 1 mM  $\text{K}_2\text{EDTA}$ , and 10 mM  $\text{K}_2\text{HPO}_4$  (pH 7.0) at 25°C. (C) Turbidity at 1800 s for 5  $\mu\text{M}$  DNAs (Duplex-Me0: red circle, Duplex-Me8: blue triangle) against various RGG-peptide concentrations (0, 1, 3, 5, 10, and 20  $\mu\text{M}$ ). (D) DIC images for the mixture of 20  $\mu\text{M}$  Duplex-Me0 and Duplex-Me8 with 20  $\mu\text{M}$  RGG-peptide in a buffer containing 100 mM KCl, 1 mM  $\text{K}_2\text{EDTA}$ , and 10 mM  $\text{K}_2\text{HPO}_4$  (pH 7.0) at room temperature. Scale bar = 10  $\mu\text{m}$

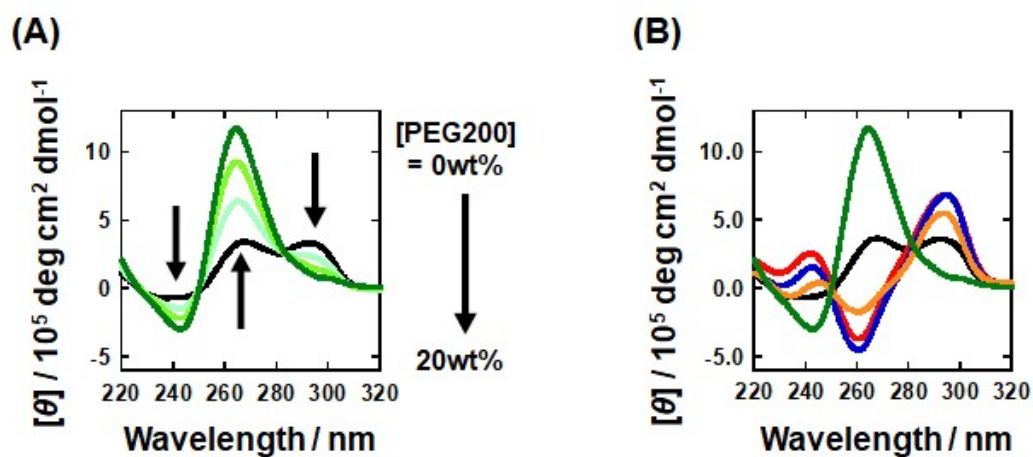

Figure S8. (A) CD spectra of 0Me in a buffer containing 100 mM KCl, 10 mM  $\text{K}_2\text{HPO}_4$  (pH 7.0), 1 mM  $\text{K}_2\text{EDTA}$  in the presence of 0, 5, 10, and 20 wt% PEG200. (B) . CD spectra of 10  $\mu\text{M}$  DNAs (0Me; black, 0Me in 20 wt% PEG200, green, 2Me; red, 4Me; blue, 8Me; orange) in a buffer containing 100 mM KCl, 1 mM  $\text{K}_2\text{EDTA}$ , and 10 mM  $\text{K}_2\text{HPO}_4$  (pH 7.0) at 25°C.

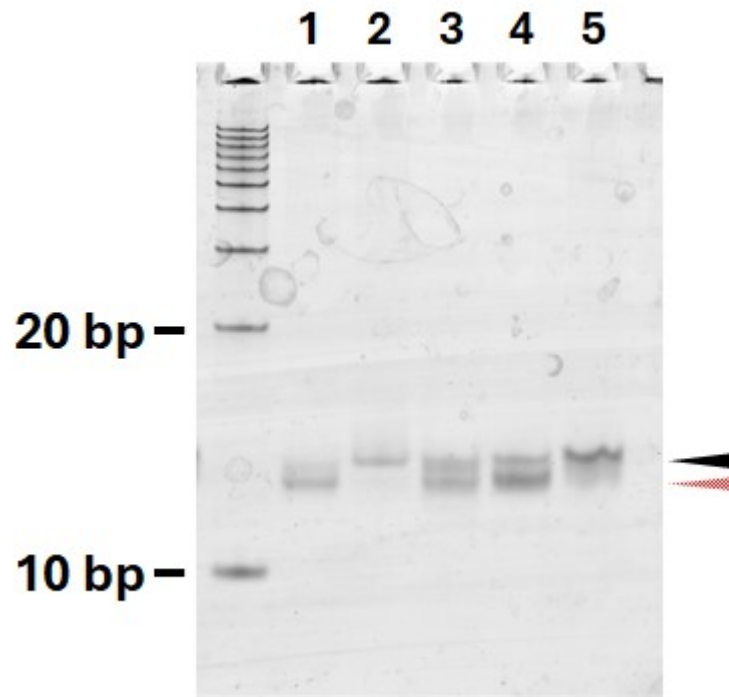

Figure S9. 18% native-PAGE of 0Me, 2Me, 4Me, and 8Me with 0 or 20 wt% PEG200 in a buffer containing 100 mM KCl, 10mM  $K_2HPO_4$  (pH 7.0), and 1 mM  $K_2EDTA$ . 10 bp ladder was loaded in the leftmost lane. Black and red arrow head indicate parallel and antiparallel topologies, respectively. Lane1: 0Me, Lane 2: 0Me with 20 wt% PEG200, Lane 3: 2Me, Lane 4: 4Me, Lane 5: 8Me

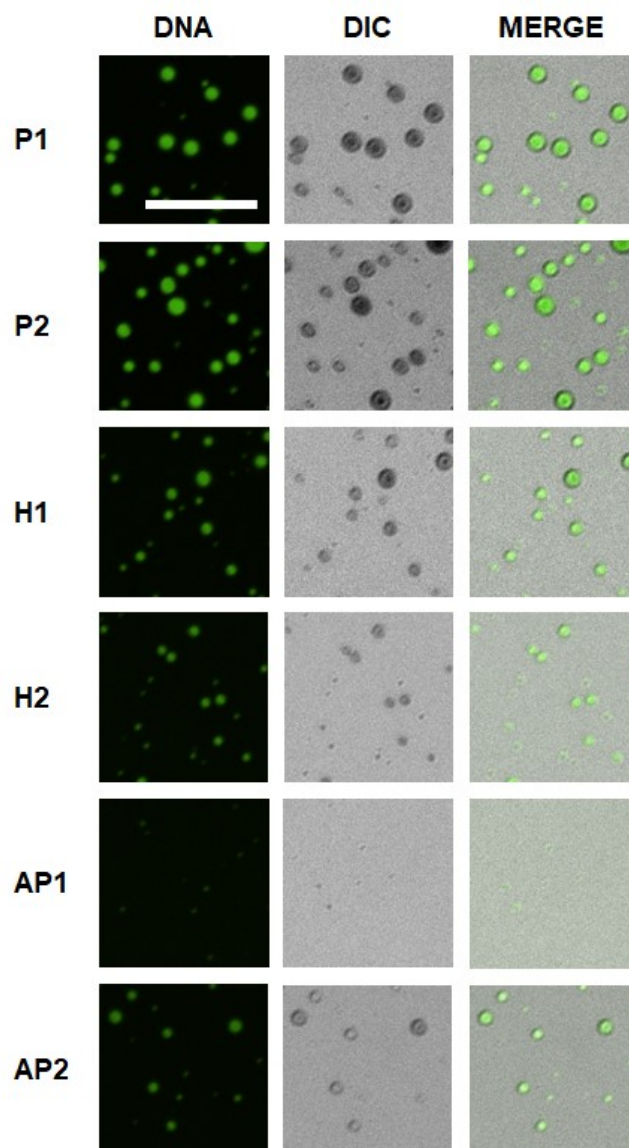

Figure S10. Confocal fluorescence/DIC microscopy images for droplets formed by 5  $\mu\text{M}$  P1, P2, H1, H2, AP1, and AP2 in the presence of 5  $\mu\text{M}$  FAM-tagged RGG-peptide in the KCl buffer at room temperature. Images were captured 30 min after mixing DNA and RGG-peptide. Scale bar = 10  $\mu\text{m}$ .

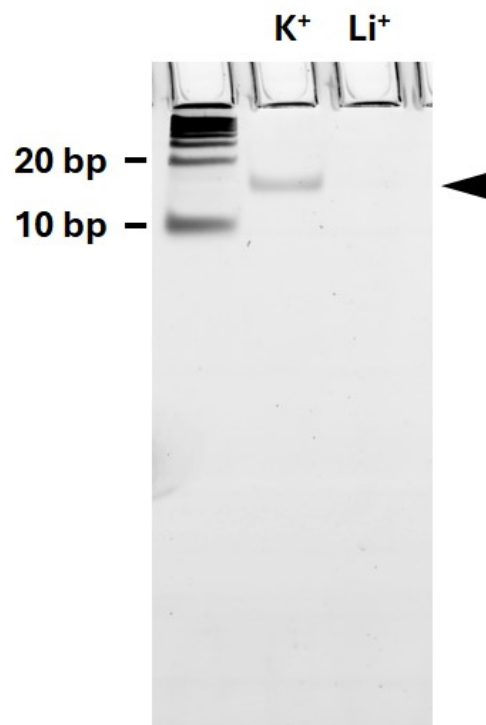

Figure S11. 20% native-PAGE of 40  $\mu$ M tetramer G4 in the presence of 100 mM  $K^+$  or  $Li^+$ . 10 bp ladder was loaded in the leftmost lane.

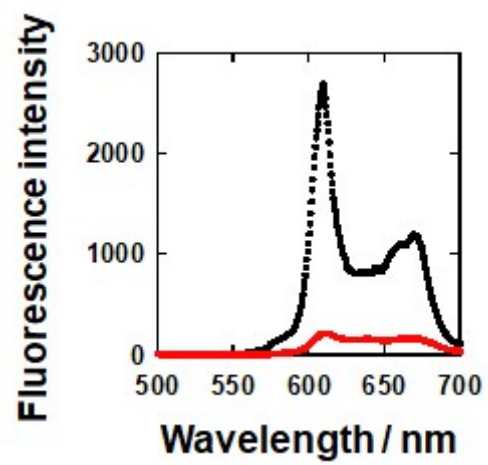

Figure S12. Fluorescence spectra of 40  $\mu\text{M}$  tetramer G4 with 5  $\mu\text{M}$  NMM in the presence of 100 mM KCl (black) or LiCl (red).



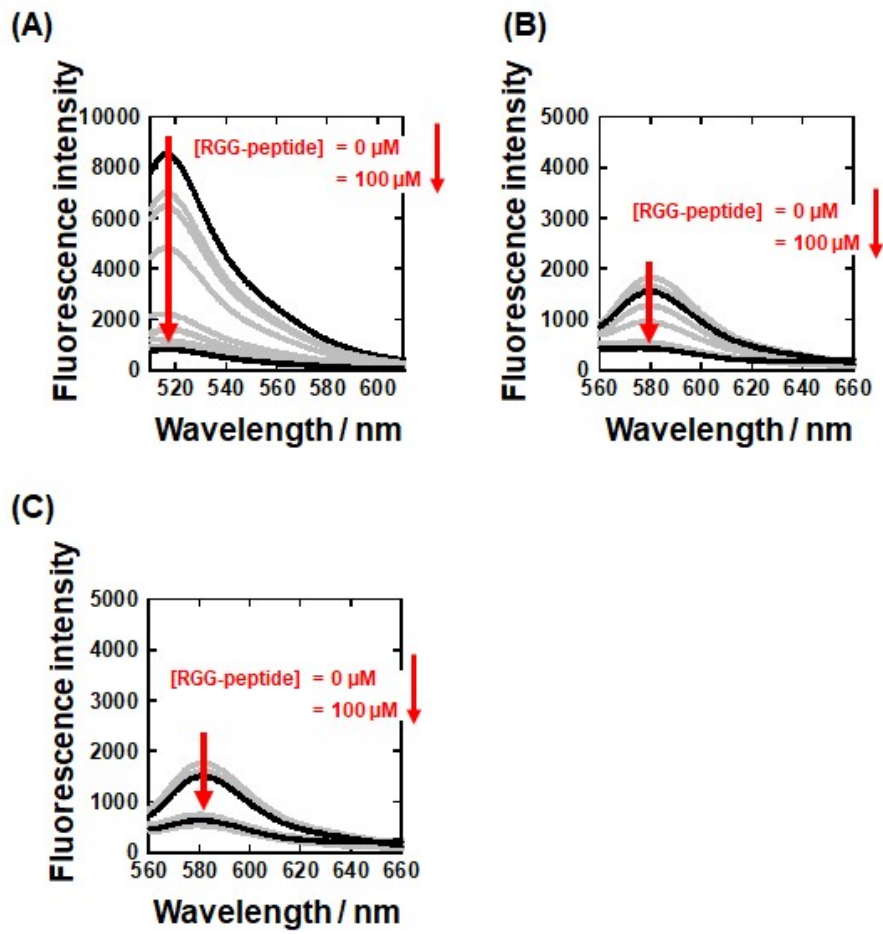

Figure S13. Fluorescence spectra of 50 nM FAM-tagged P1 (A), TAMRA-tagged H1 (B), or TAMRA-tagged AP1 (C) with various concentrations (0, 0.01, 0.03, 0.1, 0.3, 1, 3, 10, 30, and 100  $\mu\text{M}$ ) of RGG-peptide in the KCl buffer at 25  $^{\circ}\text{C}$ .

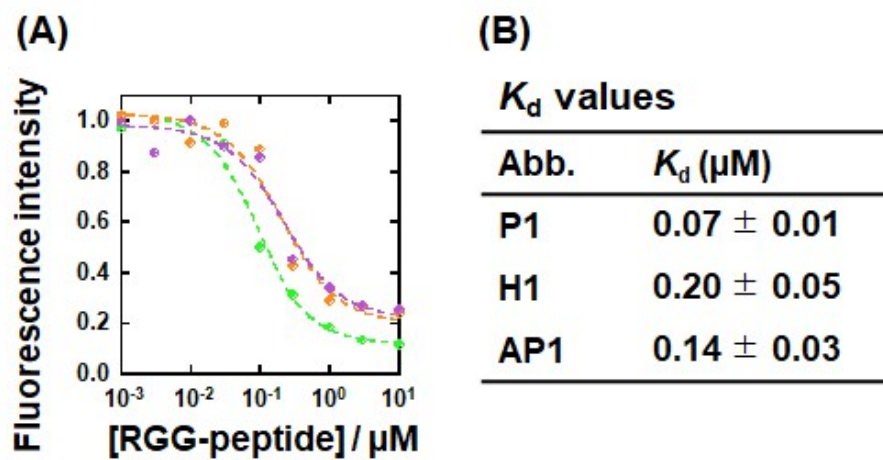

Figure S14. (A) The Plots of relative fluorescence for 50 nM FAM-tagged P1 (green), TAMRA-tagged H1 (orange), or TAMRA-tagged AP1 (purple) as a function of RGG-peptide concentration. All measurements were carried out in KCl buffer at 25 °C. (B) The  $K_d$  values of P1, H1, and AP1 with RGG-peptide in the KCl buffer at 25 °C.

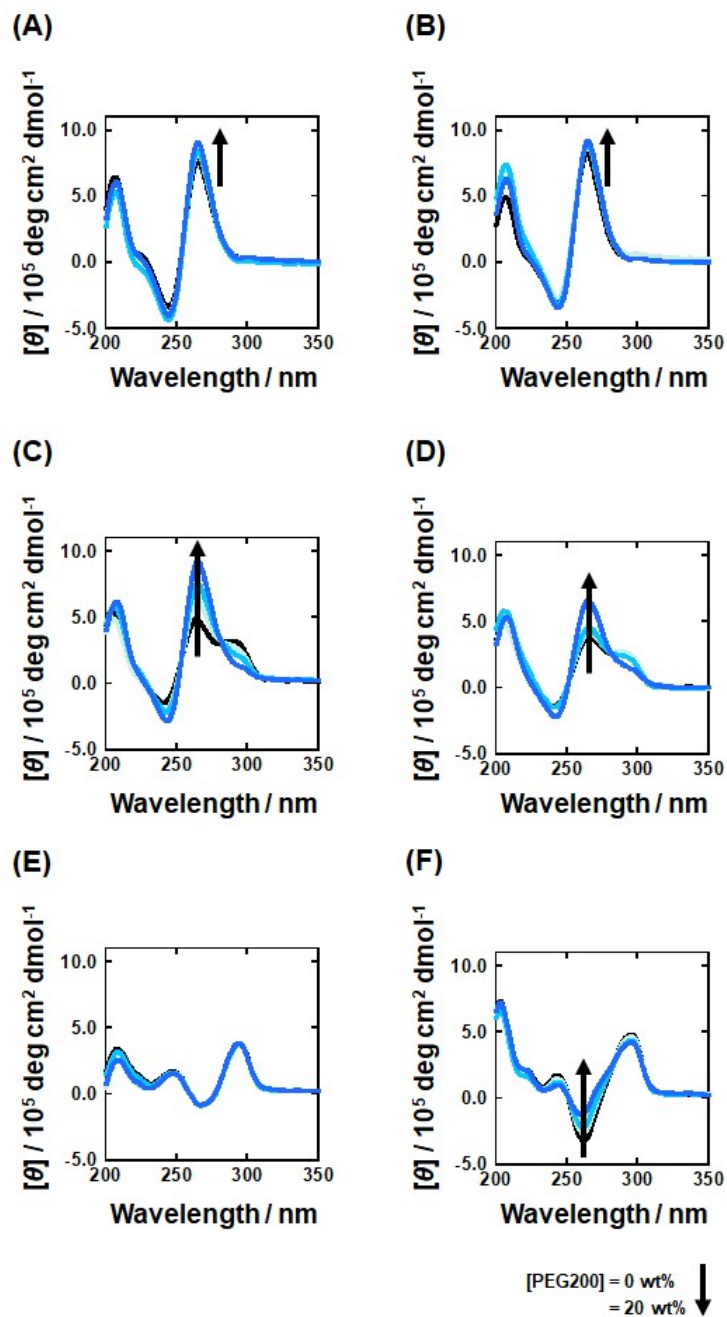

Figure S15. CD spectra for 10  $\mu\text{M}$  various topology forming DNAs [(A) P1, (B) P2, (C) H1, (D) H2, (E) AP1, and (F) AP2] in the presence of various concentrations (0, 5, 10, and 20 wt%) of PEG200 in the KCl buffer at 25  $^{\circ}\text{C}$ .

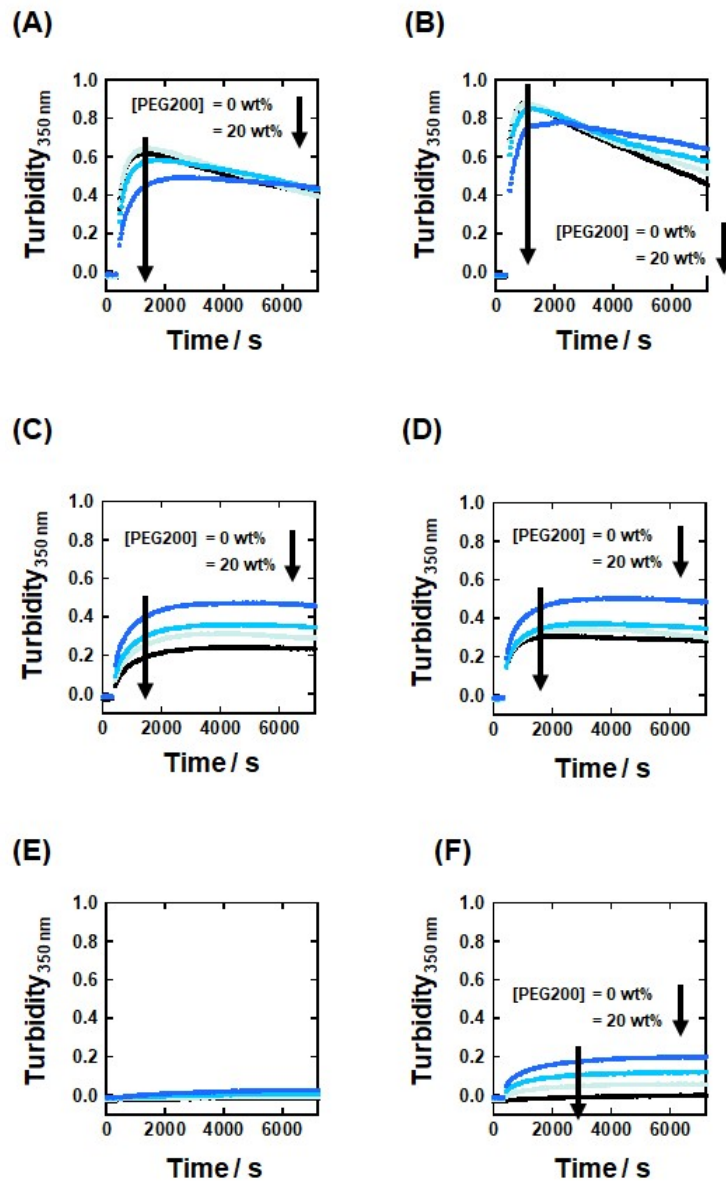

Figure S16. Turbidity for 5  $\mu\text{M}$  various DNAs [(A) P1, (B) P2, (C) H1, (D) H2, (E) AP1, and (F) AP2] with 5  $\mu\text{M}$  RGG-peptide in the presence of various concentrations (0, 5, 10, and 20 wt%) of PEG200 in the KCl buffer at 25  $^{\circ}\text{C}$ .
